# Supplementary material for: Field intercomparison of prevailing sonic anemometers
Source: Copernicus journal article supplement (doi:10.5194/amt-11-249-2018), 2018-01-12
Supplement: Supplementary file 1 [file amt-11-249-2018-supplement.zip]

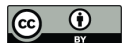

## *Supplement of*

# **Field intercomparison of prevailing sonic anemometers**

**Matthias Mauder and Matthias J. Zeeman**

*Correspondence to:* Matthias Mauder ([matthias.mauder@kit.edu](mailto:matthias.mauder@kit.edu))

- [amt-11-249-2018-supplement-title-page.pdf](#)
- [Ts.txt](#)
- [sigma\\_Ts.txt](#)
- [sigma\\_w.txt](#)
- [u.txt](#)
- [u\\_star.txt](#)
- [wT.txt](#)

The copyright of individual parts of the supplement might differ from the CC BY 4.0 License.
